# Supplementary figures and images for: Differential stepwise evolution of SARS coronavirus functional proteins in different host species
Source: Springer Nature journal article supplement (doi:10.1186/1471-2148-9-52), 2009-03-05

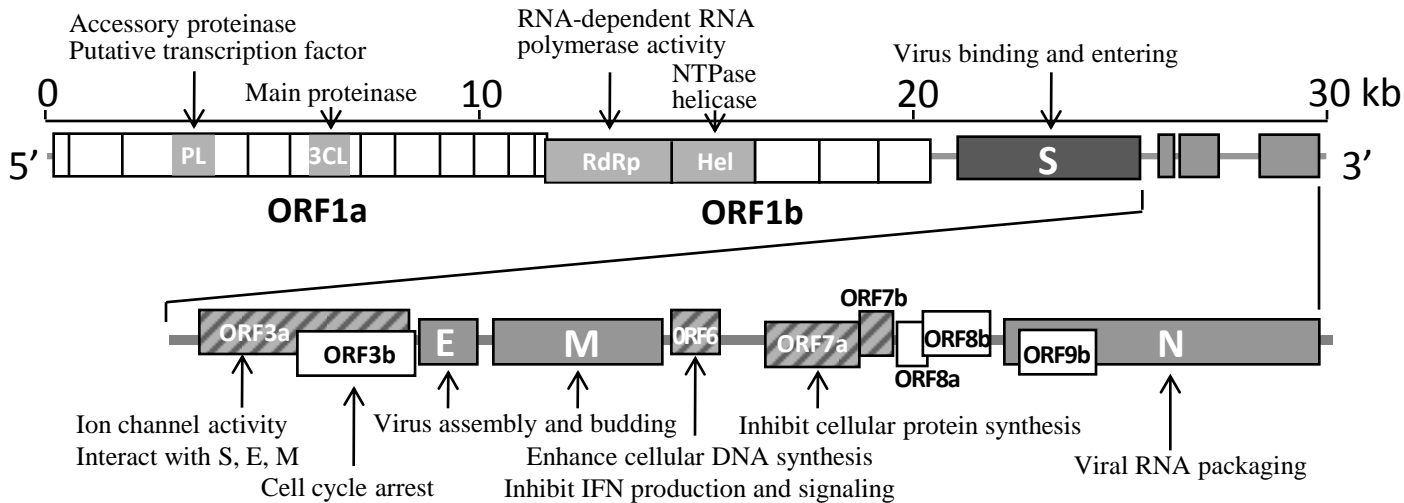

Supplement: 12862_2008_966_MOESM4_ESM.pdf [file 12862_2008_966_MOESM4_ESM.pdf]
